# Supplementary material for: Biocompatible folate-modified Gd3+/Yb3+-doped ZnO nanoparticles for dualmodal MRI/CT imaging
Source: Royal Society of Chemistry journal article supplement (doi:10.1039/c4ra08100e), 2014-01-01
Supplement: c4ra08100e1.pdf [file c4ra08100e1.pdf]

Supplementary information for

Biocompatible Folate-modified Gd<sup>3+</sup>/Yb<sup>3+</sup>-doped ZnO  
Nanoparticles for Dualmodal MRI/CT Imaging

Qi Yin,<sup>a</sup> Xiaoying Jin,<sup>a,b</sup> Guocheng Yang,<sup>a,b</sup> Chunhuan Jiang,<sup>c</sup> Zhongkai Song,<sup>a</sup> and Guoying Sun<sup>\*a,b</sup>

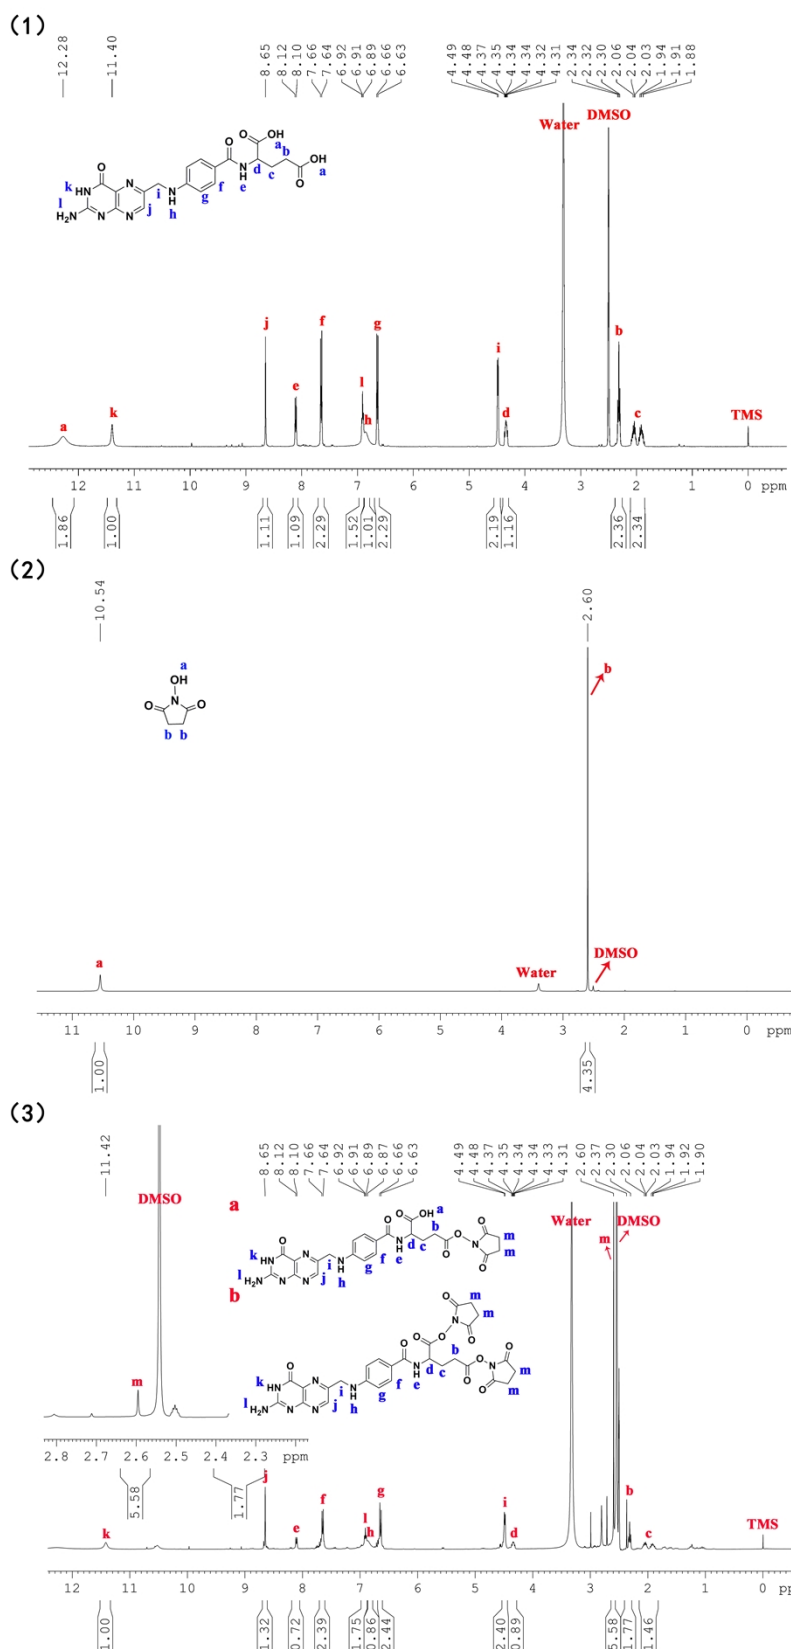

Figure S1  $^1\text{H}$  NMR spectra of folate (1), NHS (2) and folate-NHS (3) in DMSO, respectively. All proton signals have been assigned. Two possible structural formula of folate-NHS were presented. The peak at 2.60 ppm (m in Figure S1 (3)) can be assigned to the  $\text{CH}_2$  of NHS, which demonstrates the conjugation of NHS to folate.

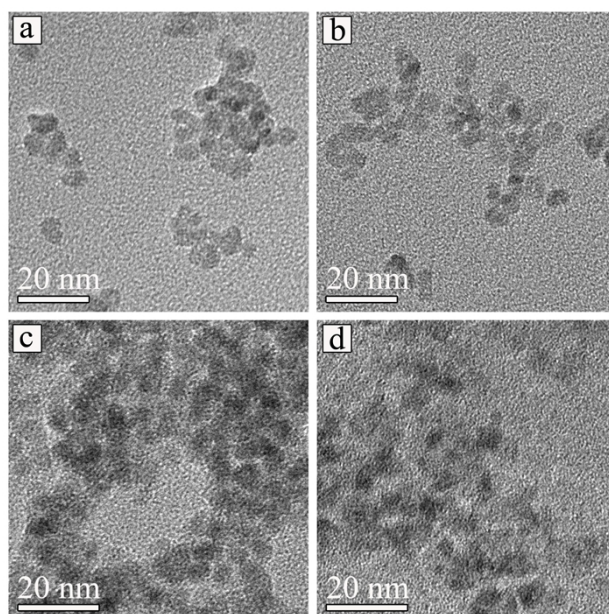

Figure S2 TEM images of ZnO:Gd,Yb-FA with the x value of 0.03 (a), 0.08 (b), 0.2 (c) and 0.3 (d), respectively.

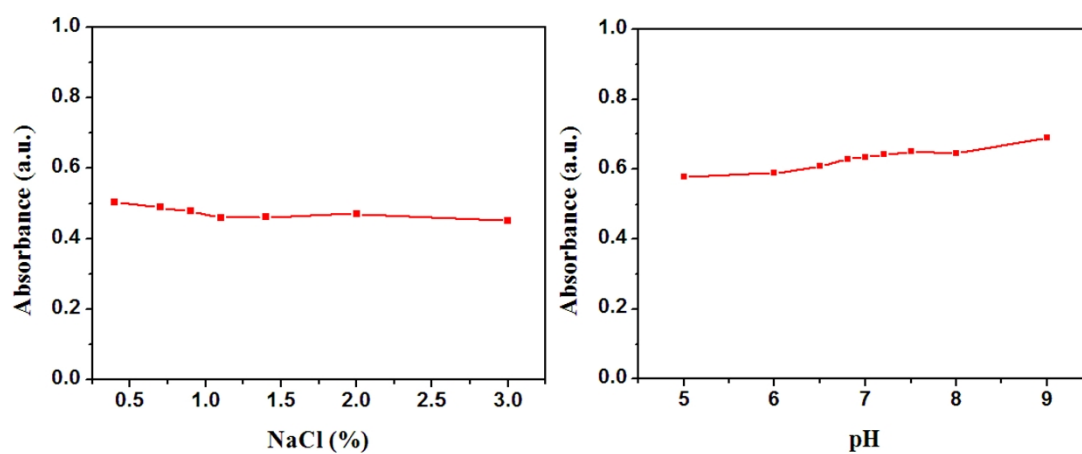

Figure S3 Absorbance of FA-modified ZnO:Gd,Yb NPs ( $x = 0.1$ ) as a function of NaCl concentration and pH.

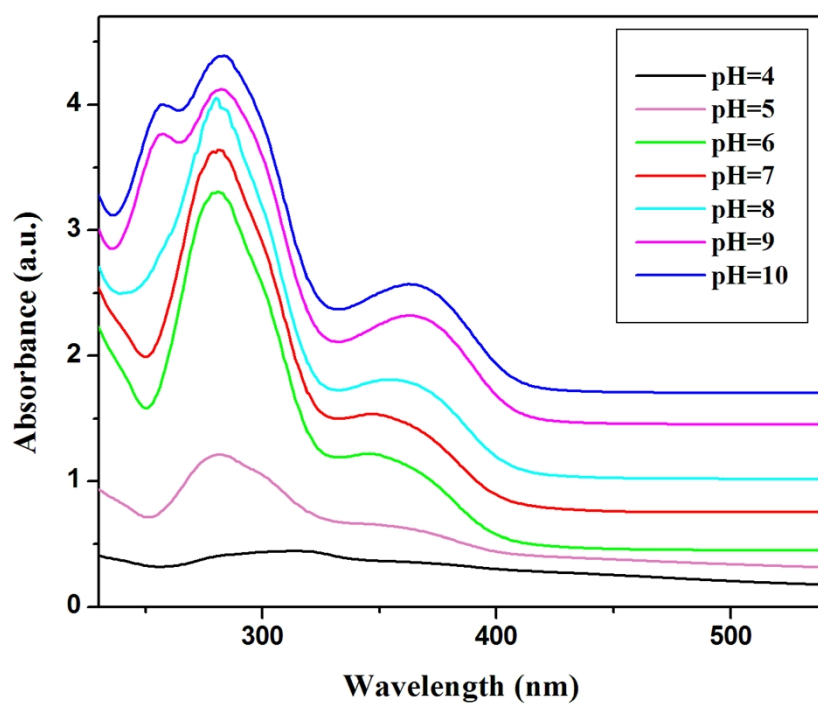

Figure S4 UV-vis spectra of folate at different pH values.

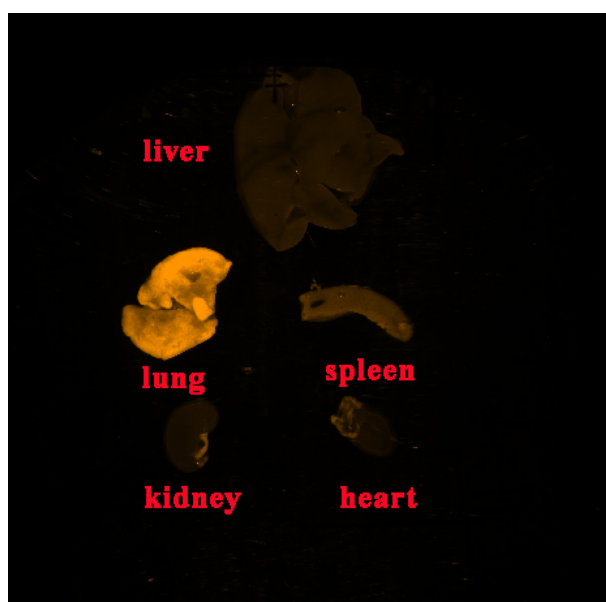

Figure S5 Biodistribution analysis of ZnO-FA NPs by fluorescence imaging of several organ (heart, liver, spleen, lung and kidney) harvested from the mice 1 h after injection of the as-prepared ZnO-FA NPs solution.

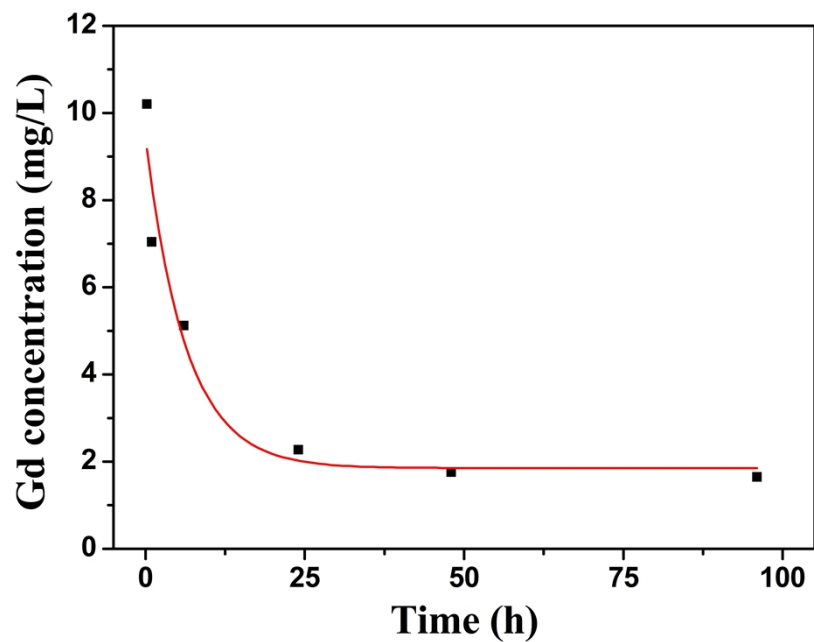

Figure S6 The blood retention of ZnO:Gd,Yb-FA NPs ( $x = 0.1$ ) in Wistar mice ( $n = 3$ ) at 0.25, 1, 6, 24, 48 and 96 h post-injection.

Table S1. Comparison between ZnO:Gd,Yb-FA NPs with different  $x$  values.

| The mole ratio of<br>Gd(Ac) <sub>3</sub> and<br>Zn(Ac) <sub>2</sub><br>( $x$ ) | The mole ratio of<br>Yb(Ac) <sub>3</sub> and<br>Zn(Ac) <sub>2</sub><br>( $x$ ) | The mole ratio of<br>Gd <sup>3+</sup> and Zn <sup>2+</sup> in<br>NPs by ICP-OES | The mole ratio of<br>Yb <sup>3+</sup> and Zn <sup>2+</sup> in<br>NPs by ICP-OES | Diameter of average<br>particles by XRD<br>(nm) |
|--------------------------------------------------------------------------------|--------------------------------------------------------------------------------|---------------------------------------------------------------------------------|---------------------------------------------------------------------------------|-------------------------------------------------|
| 0                                                                              | 0                                                                              | 0                                                                               | 0                                                                               | 6.078                                           |
| 0.03                                                                           | 0.03                                                                           | 0.0046                                                                          | 0.0070                                                                          | 5.078                                           |
| 0.08                                                                           | 0.08                                                                           | 0.0100                                                                          | 0.0151                                                                          | 5.034                                           |
| 0.1                                                                            | 0.1                                                                            | 0.0156                                                                          | 0.0262                                                                          | 5.011                                           |
| 0.2                                                                            | 0.2                                                                            | 0.0218                                                                          | 0.0423                                                                          | 4.499                                           |
| 0.3                                                                            | 0.3                                                                            | 0.0459                                                                          | 0.1281                                                                          | 4.434                                           |
